# Supplementary material for: Fast kinetics of monoclinic VO2(B) bulk upon magnesiation via DFT+U calculations
Source: Royal Society of Chemistry journal article supplement (doi:10.1039/d1cp02859f), 2021-12-22
Supplement: d1cp02859f1.pdf [file d1cp02859f1.pdf]

## Electronic Supplementary Information

### Fast kinetics of monoclinic VO<sub>2</sub>(B) bulk upon magnesianation via DFT+U calculation

Danmei Gao<sup>a</sup>, Jingren Dong<sup>c</sup>, Renchao Xiao<sup>a,d</sup>, Bo Shang<sup>a</sup>, Danmei Yu<sup>a</sup>, Changguo Chen<sup>a</sup>,  
Yuping Liu<sup>\*a,b,c,e</sup>, Kai Zheng<sup>\*c</sup>, Fusheng Pan<sup>b</sup>

<sup>a</sup> College of Chemistry and Chemical Engineering, Chongqing University, Chongqing, 400044, PR China, E-mail: liuyuping@cqu.edu.cn

<sup>b</sup> National Engineering Research Centre for Magnesium Alloys, Chongqing University, Chongqing, 400044, China,

<sup>c</sup> State Key Laboratory of Coal Mine Disaster Dynamics and Control, Chongqing University, Chongqing, 400044, PR China, E-mail: zkcqu@cqu.edu.cn

<sup>d</sup> Huading Guolian Sichuan Automotive Battery Co. Ltd., Chengdu, 610399, PR China, E-mail: 1053576360@qq.com

<sup>e</sup> Chongqing Key Laboratory of Materials Surface & Interface Science, Chongqing University of Arts and Sciences, Chongqing 402160, China, E-mail: dongjingren@cqu.edu.cn

#### AUTHOR INFORMATION

##### Corresponding author:

**Name:** Yuping Liu

**Tel:** +86 13594157660

**E-mail:** [liuyuping@cqu.edu.cn](mailto:liuyuping@cqu.edu.cn)

**Name:** Kai Zheng

E-mail: [zkcqu@cqu.edu.cn](mailto:zkcqu@cqu.edu.cn)

#### 1. Supporting Figure

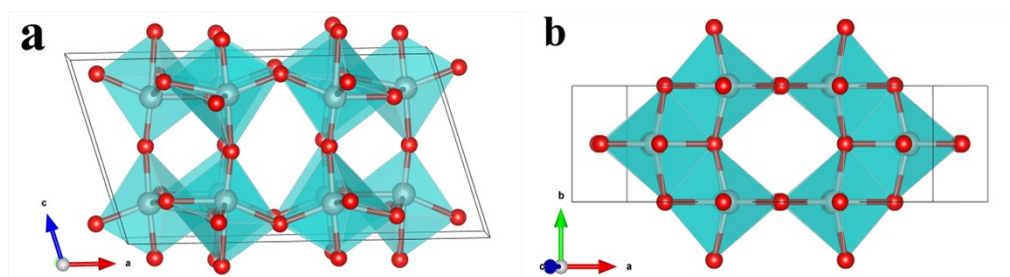

**Fig. S1.** Polyhedron configurations of VO<sub>2</sub>(B) crystal: (a) (010) direction; (b) (001) direction.

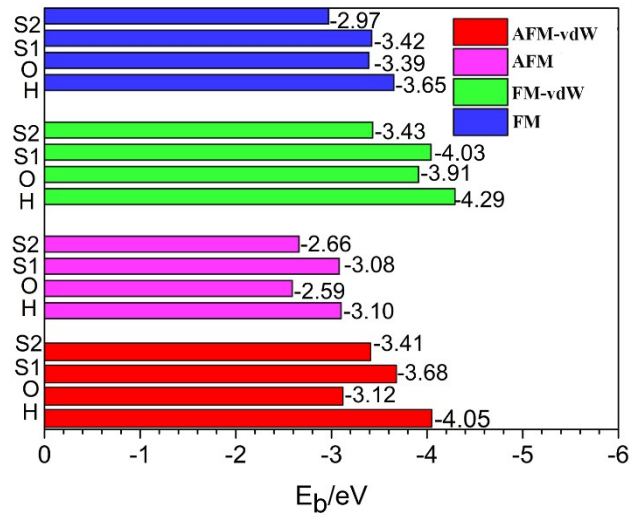

**Fig. S2** The binding energies  $E_b$  of a single magnesium ion insertion into the  $1 \times 1 \times 2$  supercell of  $\text{VO}_2(\text{B})$  in different calculation conditions.

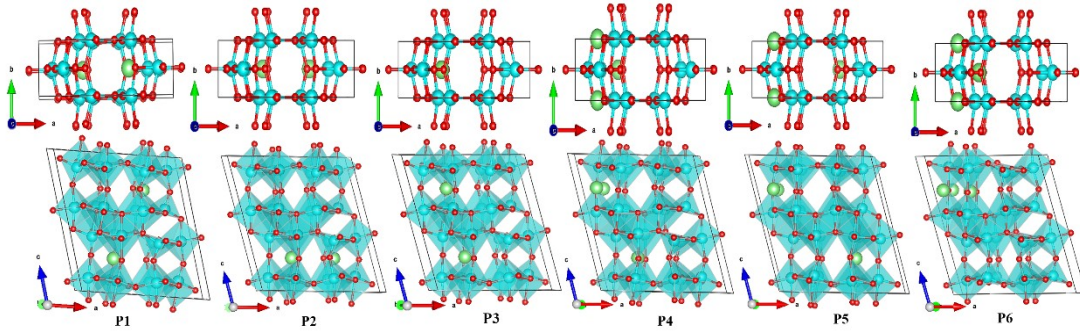

**Fig. S3** Various configurations of  $\text{Mg}_{0.125}\text{VO}_2(\text{B})$  in the FM and AFM states.

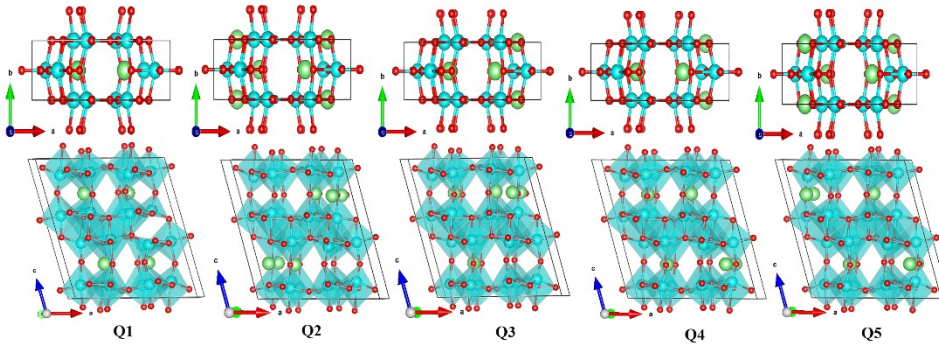

**Fig. S4** Different configurations of  $\text{Mg}_{0.25}\text{VO}_2(\text{B})$  in the FM states

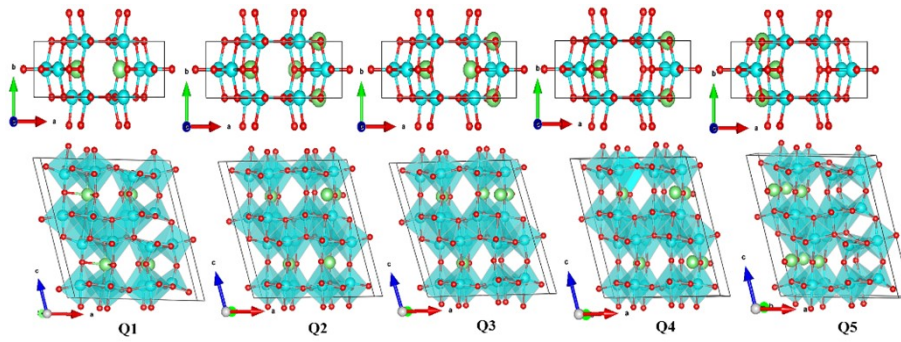

Fig. S5 Different configurations of  $\text{Mg}_{0.25}\text{VO}_2(\text{B})$  in the AFM states

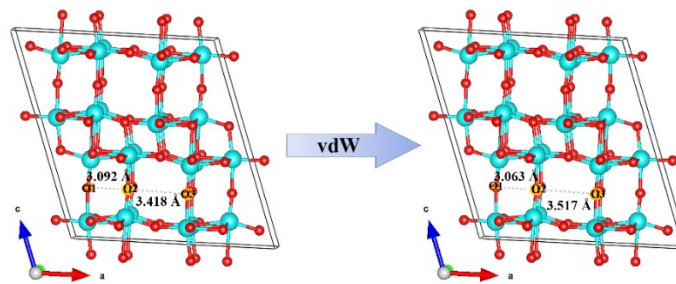

Fig. S6 O-O distance evolution near the diffusion path with and without van der Waals forces

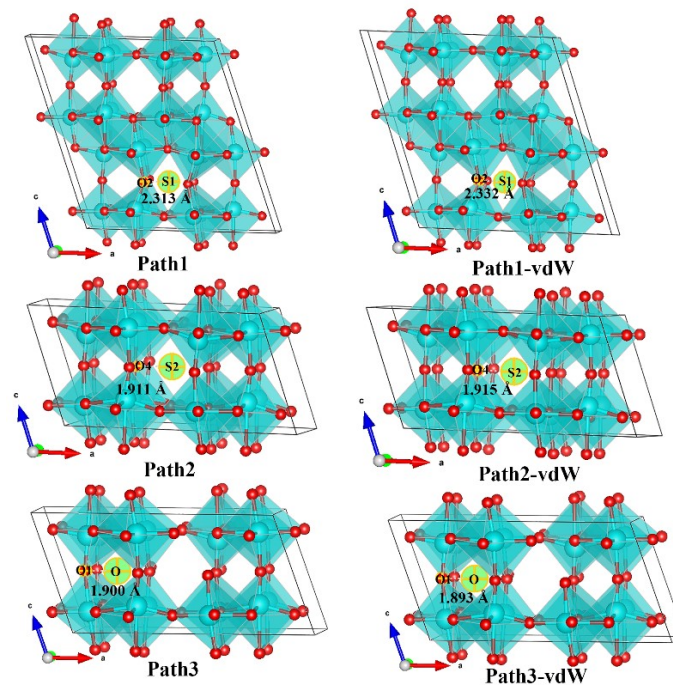

Fig. S7 The transition state configurations with the highest energy barrier in respective pathways and the corresponding distances between  $\text{Mg}^{2+}$  and surrounding O atom

## 2. Supporting Tables

**Table. S1** Optimized and experimental lattice parameters/energies of  $1 \times 1 \times 2$  supercell for  $\text{VO}_2(\text{B})$  in the four states

|         | a(Å)  | b(Å)  | c(Å)  | V(Å <sup>3</sup> ) | Er (%) | Energy(eV) |
|---------|-------|-------|-------|--------------------|--------|------------|
| Exp     | 12.03 | 3.693 | 12.84 | 546.67             | -      | -          |
| FM      | 12.10 | 3.74  | 13.31 | 579.45             | 6.00   | -350.49    |
| FM-vdW  | 12.09 | 3.74  | 13.31 | 579.44             | 6.00   | -359.66    |
| AFM     | 12.26 | 3.86  | 12.84 | 582.87             | 6.62   | -351.04    |
| AFM-vdW | 12.16 | 3.83  | 12.78 | 572.45             | 4.71   | -360.31    |

**Table. S2** The formation energies of  $\text{Mg}_{0.125}\text{VO}_2(\text{B})$  in different configurations

| $\text{Mg}_{0.125}\text{VO}_2(\text{B})$ | $E_f(\text{P1})/\text{eV}$ | $E_f(\text{P2})/\text{eV}$ | $E_f(\text{P3})/\text{eV}$ | $E_f(\text{P4})/\text{eV}$ | $E_f(\text{P5})/\text{eV}$ | $E_f(\text{P6})/\text{eV}$ |
|------------------------------------------|----------------------------|----------------------------|----------------------------|----------------------------|----------------------------|----------------------------|
| FM-vdW                                   | -3.37                      | -3.23                      | -3.14                      | -2.95                      | -3.09                      | -2.76                      |
| AFM-vdW                                  | -1.66                      | -1.87                      | -2.05                      | -1.86                      | -1.94                      | -1.35                      |

**Table. S3** The formation energies of  $\text{Mg}_{0.25}\text{VO}_2(\text{B})$  in different configurations

| $\text{Mg}_{0.25}\text{VO}_2(\text{B})$ | $E_f(\text{Q1})/\text{eV}$ | $E_f(\text{Q2})/\text{eV}$ | $E_f(\text{Q3})/\text{eV}$ | $E_f(\text{Q4})/\text{eV}$ | $E_f(\text{Q5})/\text{eV}$ |
|-----------------------------------------|----------------------------|----------------------------|----------------------------|----------------------------|----------------------------|
| FM-vdW                                  | -6.35                      | -6.11                      | -6.12                      | -5.85                      | -5.77                      |
| AFM-vdW                                 | -5.16                      | -5.09                      | -5.00                      | -5.37                      | -5.02                      |

**Table. S4** The formation energies of  $\text{Mg}_x\text{VO}_2(\text{B})$  ( $0 \leq x \leq 1.25$ ) in the FM-vdW, AFM-vdW, FM and AFM states

| $\text{Mg}_x\text{VO}_2(\text{B})$       | $E_{\text{FM-vdW}}(\text{eV})$ | $E_{\text{AFM-vdW}}(\text{eV})$ | $E_{\text{FM}}(\text{eV})$ | $E_{\text{AFM}}(\text{eV})$ |
|------------------------------------------|--------------------------------|---------------------------------|----------------------------|-----------------------------|
| $\text{Mg}_{0.125}\text{VO}_2(\text{B})$ | -371.71                        | -371.40                         | -361.04                    | -361.34                     |
| $\text{Mg}_{0.25}\text{VO}_2(\text{B})$  | -383.80                        | -383.51                         | -372.54                    | -371.68                     |
| $\text{Mg}_{0.5}\text{VO}_2(\text{B})$   | -406.50                        | -406.80                         | -393.60                    | -393.60                     |
| $\text{Mg}\text{VO}_2(\text{B})$         | -438.37                        | -439.34                         | -421.35                    | -422.95                     |
| $\text{Mg}_{1.25}\text{VO}_2(\text{B})$  | -453.09                        | -454.84                         | -432.71                    | -434.25                     |

**Table. S5** The jumping distance starting from the initial state during the Mg<sup>2+</sup> migration process

| Images    | 1      | 2      | 3      | 4      | 5      | 6      | 7      | 8      |
|-----------|--------|--------|--------|--------|--------|--------|--------|--------|
| Path1     | 0.55 Å | 1.05 Å | 1.54 Å | 2.05 Å | 2.57 Å | 3.05 Å | 3.55 Å | 4.10 Å |
| Path1-vdW | 0.52 Å | 1.00 Å | 1.45 Å | 1.94 Å | 2.44 Å | 2.89 Å | 3.36 Å | 3.88 Å |
| Path2     | 0.43 Å | 0.92 Å | 1.47 Å | 2.02 Å | 2.51 Å | 2.94 Å | 3.31 Å | 3.68 Å |
| Path2-vdW | 0.37 Å | 0.79 Å | 1.28 Å | 1.84 Å | 2.39 Å | 2.88 Å | 3.30 Å | 3.67 Å |
| Path3     | 0.54 Å | 1.24 Å | 1.94 Å | 2.47 Å | 2.51 Å | 2.86 Å | 3.33 Å | 3.68 Å |
| Path3-vdW | 0.56 Å | 1.32 Å | 2.12 Å | 2.70 Å | 2.64 Å | 2.97 Å | 3.48 Å | 3.76 Å |
